# Supplementary material for: First report of trans-A2B-corrole derived from a lapachone derivative: photophysical, TD-DFT and photobiological assays
Source: PubMed Central journal article supplement (PMC10089255; doi:10.1039/d3ra00823a), 2023-04-11
Supplement: RA-013-D3RA00823A-s001.pdf [file RA-013-D3RA00823A-s001.pdf]

## Electronic Supplementary Information

### **First report of trans-A2B-corrole derived from a lapachone derivative: Photophysical, TD-DFT and Photobiological assays**

Bruna M. Rodrigues,<sup>a</sup> Carlos C. Diniz,<sup>a</sup> Vinicius N. da Rocha,<sup>b</sup> Mateus H. Kohler,<sup>b</sup>  
Guilherme P. Brandão,<sup>c</sup> Luana A. Machado,<sup>c,d</sup> Eufranio N. da Silva Júnior<sup>\*c</sup> and Bernardo  
A. Iglesias<sup>\*a</sup>

<sup>a</sup>*Bioinorganic and Porphyrinoid Material Laboratory, Department of Chemistry, Federal University of Santa Maria, Santa Maria-RS, Brazil;*

<sup>b</sup>*Department of Physics, Federal University of Santa Maria, Santa Maria-RS, Brazil;*

<sup>c</sup>*Department of Chemistry, Federal University of Minas Gerais, Belo Horizonte-MG, Brazil;*

<sup>d</sup>*Julius Maximilians-Universität Würzburg (JMU), Institute for Inorganic Chemistry, Am Hubland, 97074 Würzburg, Germany.*

Central de Análises - UCS

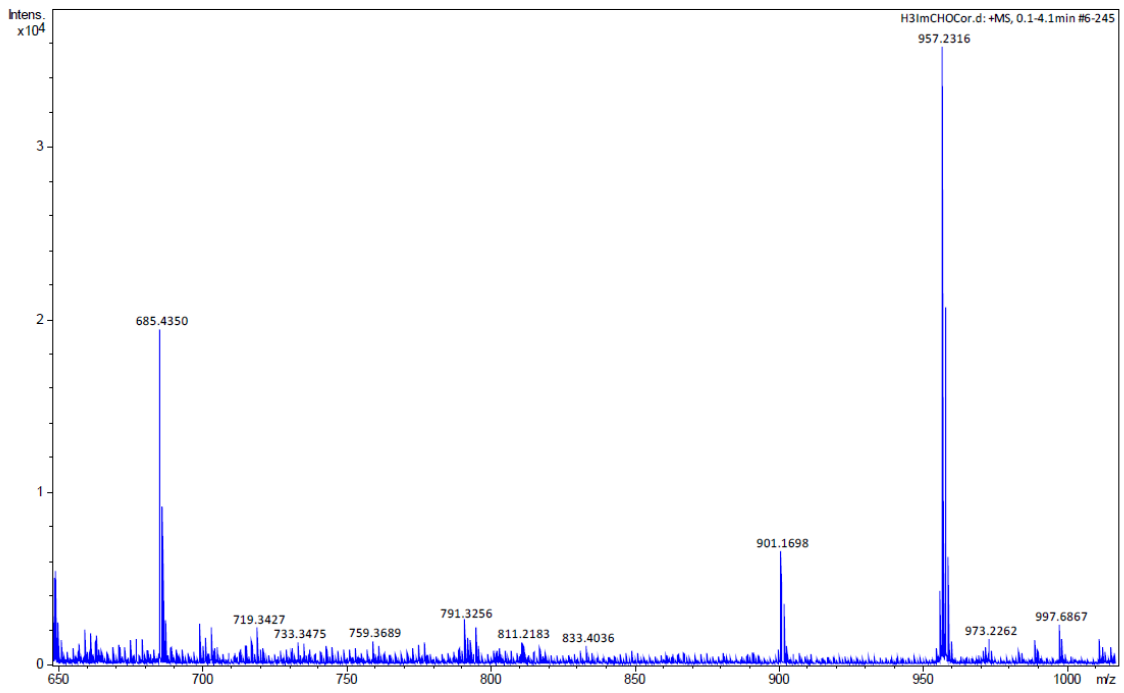

Central de Análises - UCS

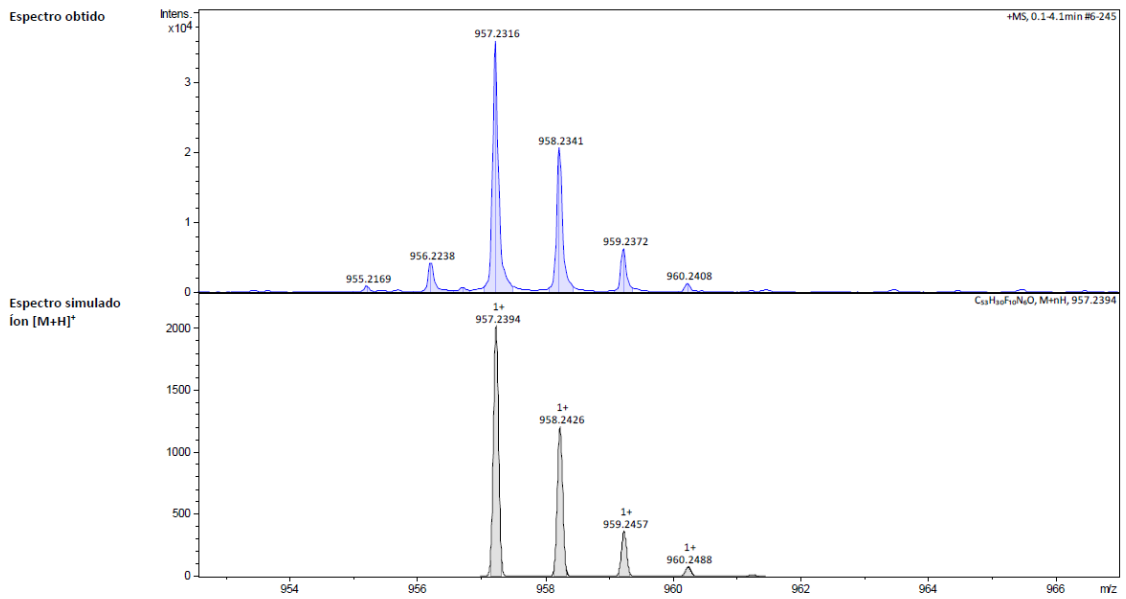

Figure S1. HRMS-ESI(+) spectrum of corrole H<sub>3</sub>LapCor.

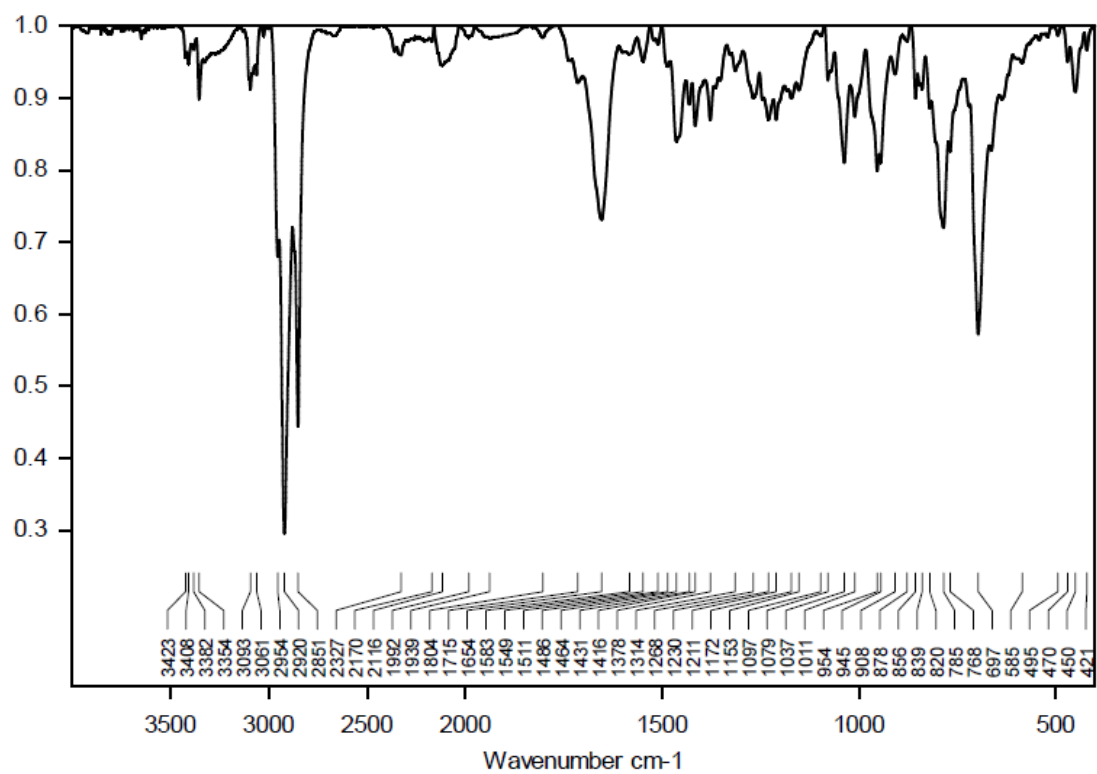

**Figure S2.** FTIR ATR spectrum of corrole **H<sub>3</sub>LapCor**.

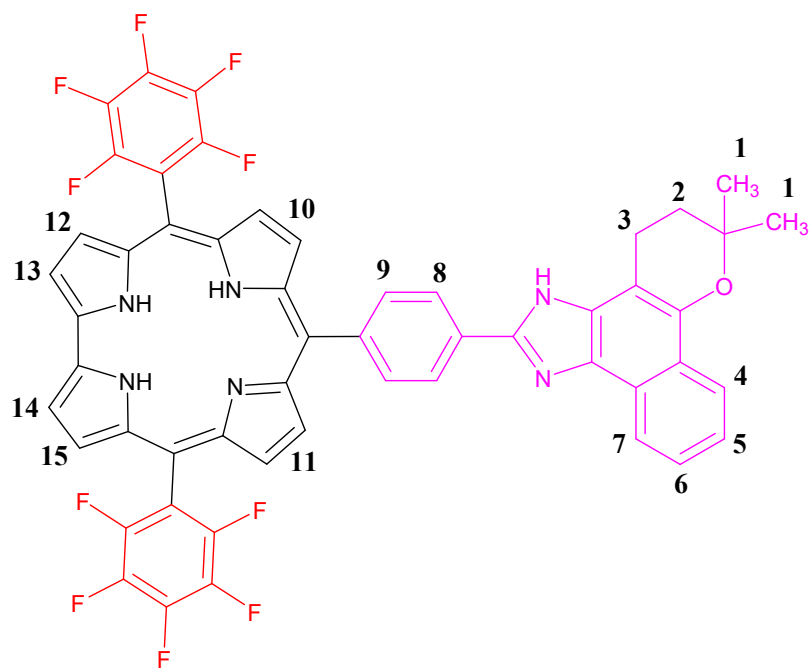

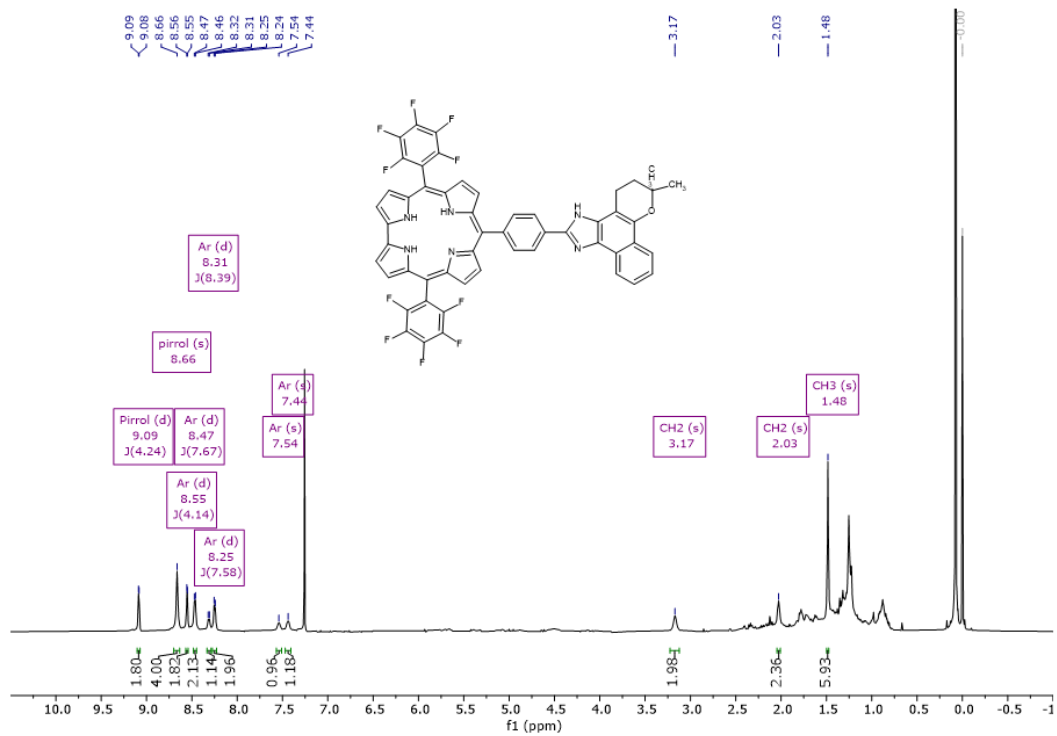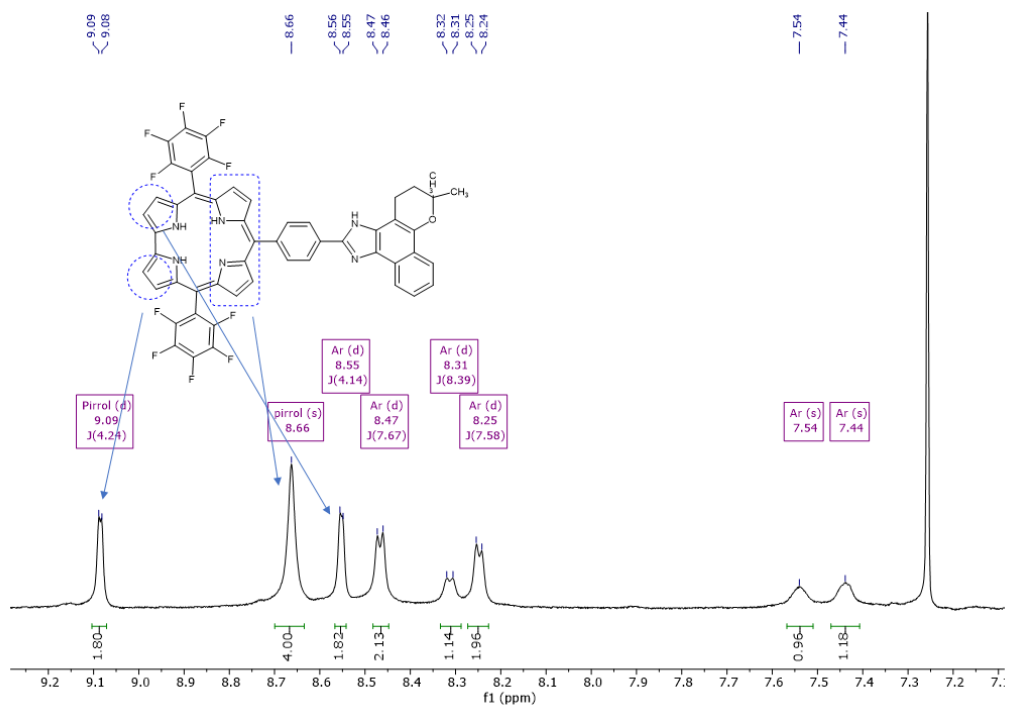

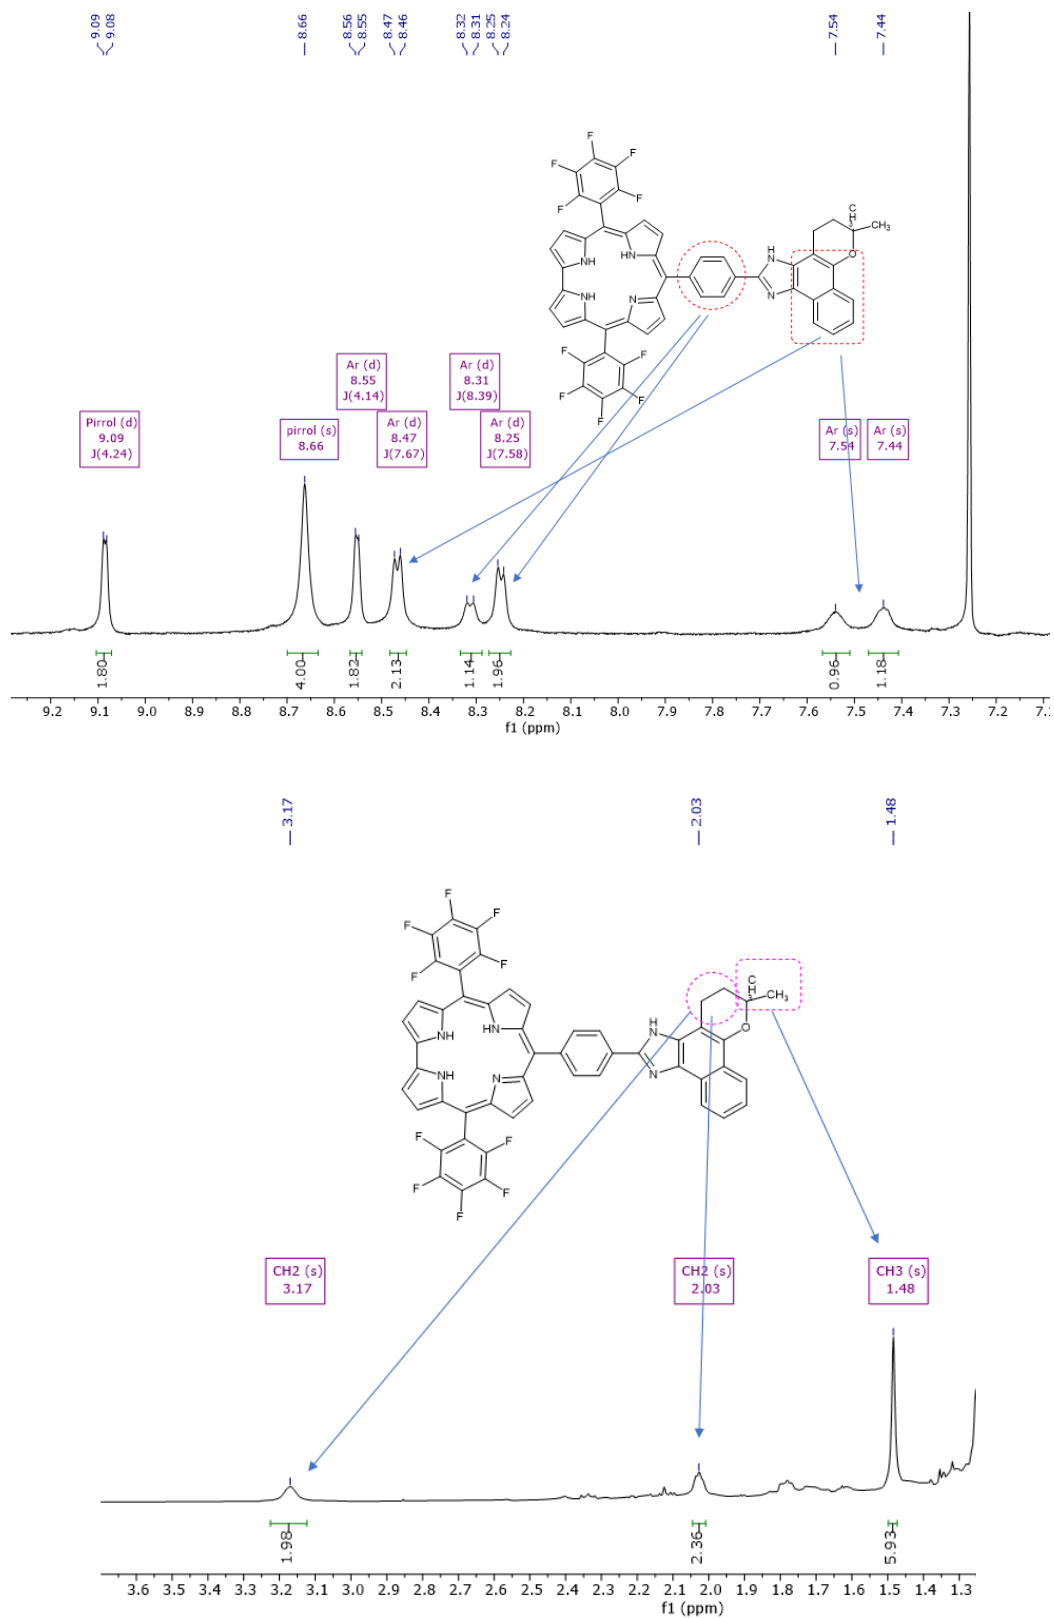

**Figure S3.** <sup>1</sup>H NMR spectrum (600 MHz) of corrole H<sub>3</sub>LapCor in CDCl<sub>3</sub>.

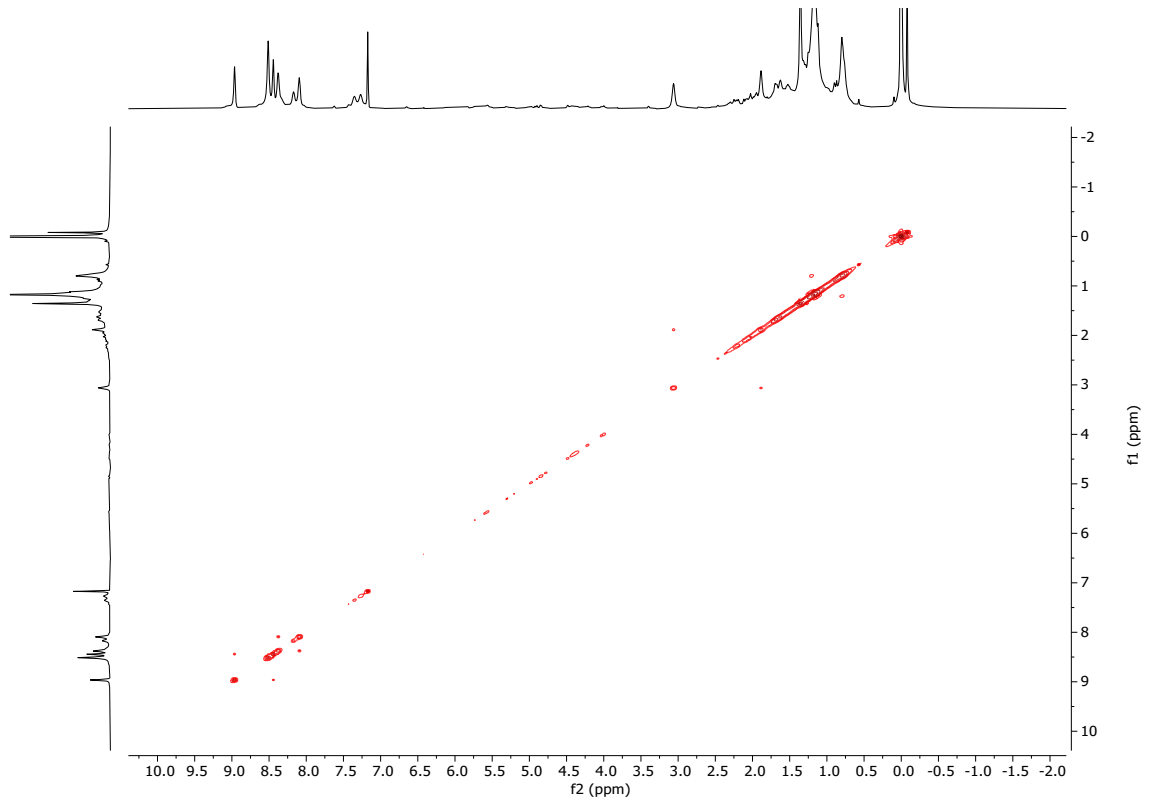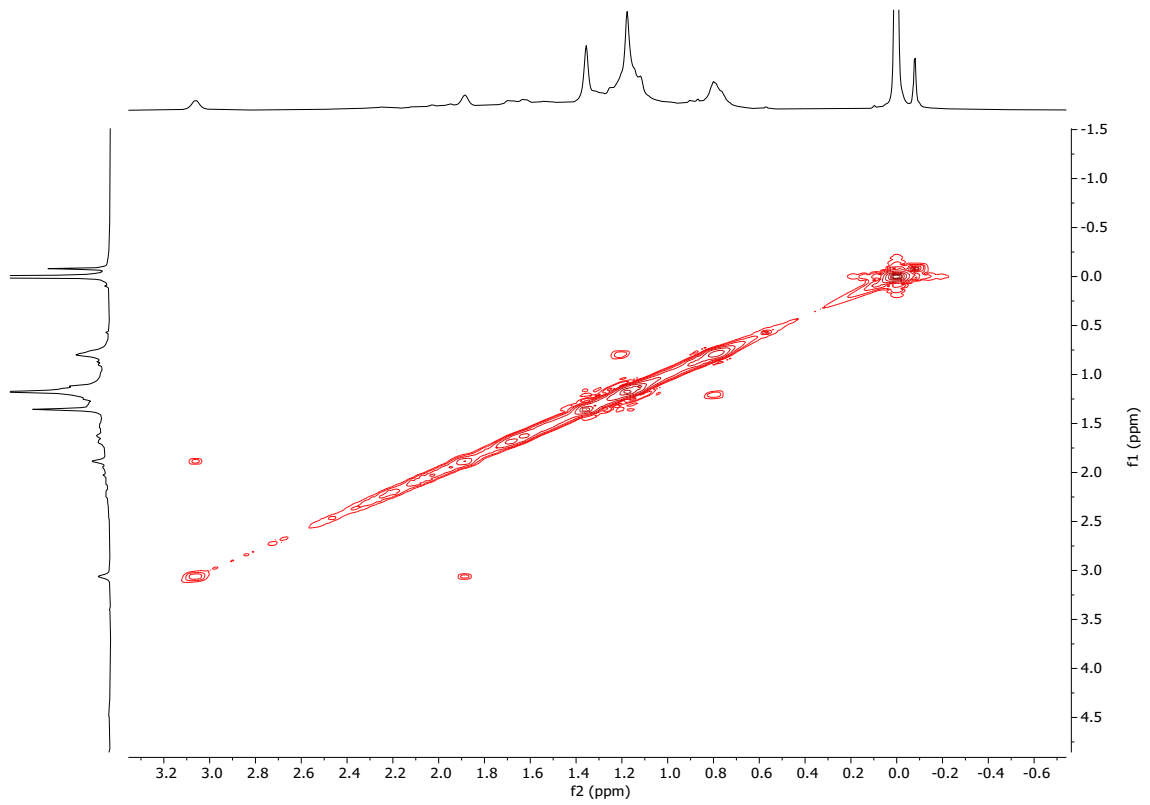

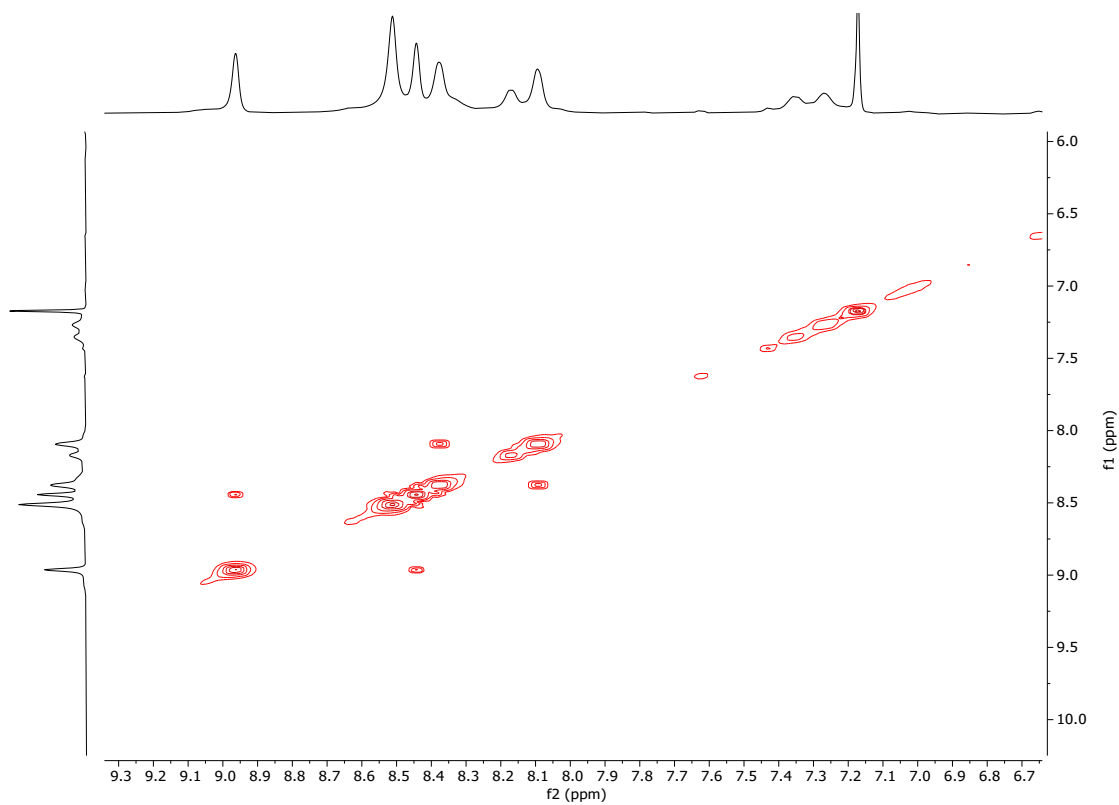

**Figure S4.**  $^1\text{H}$ - $^1\text{H}$  COSY 2D NMR spectrum of corrole **H<sub>3</sub>LapCor** in  $\text{CDCl}_3$ .

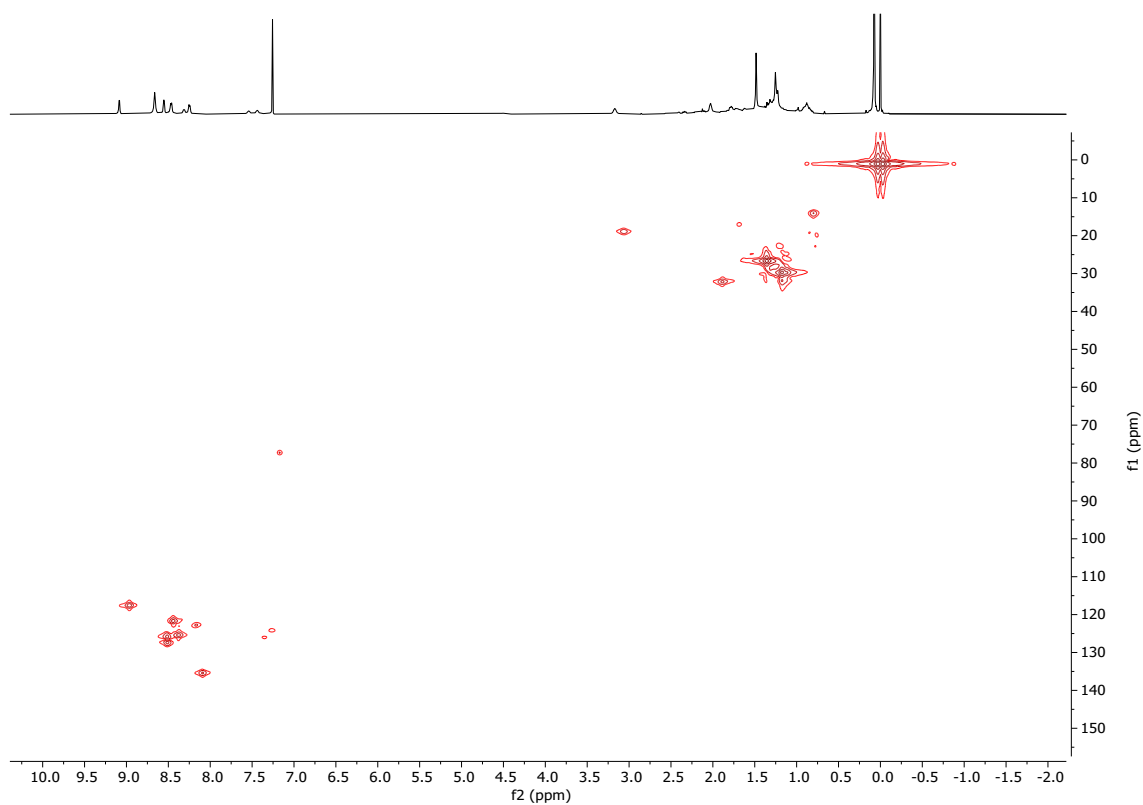

**Figure S5.**  $^1\text{H}$ - $^{13}\text{C}$  HMBC NMR spectrum of corrole **H<sub>3</sub>LapCor** in  $\text{CDCl}_3$ .

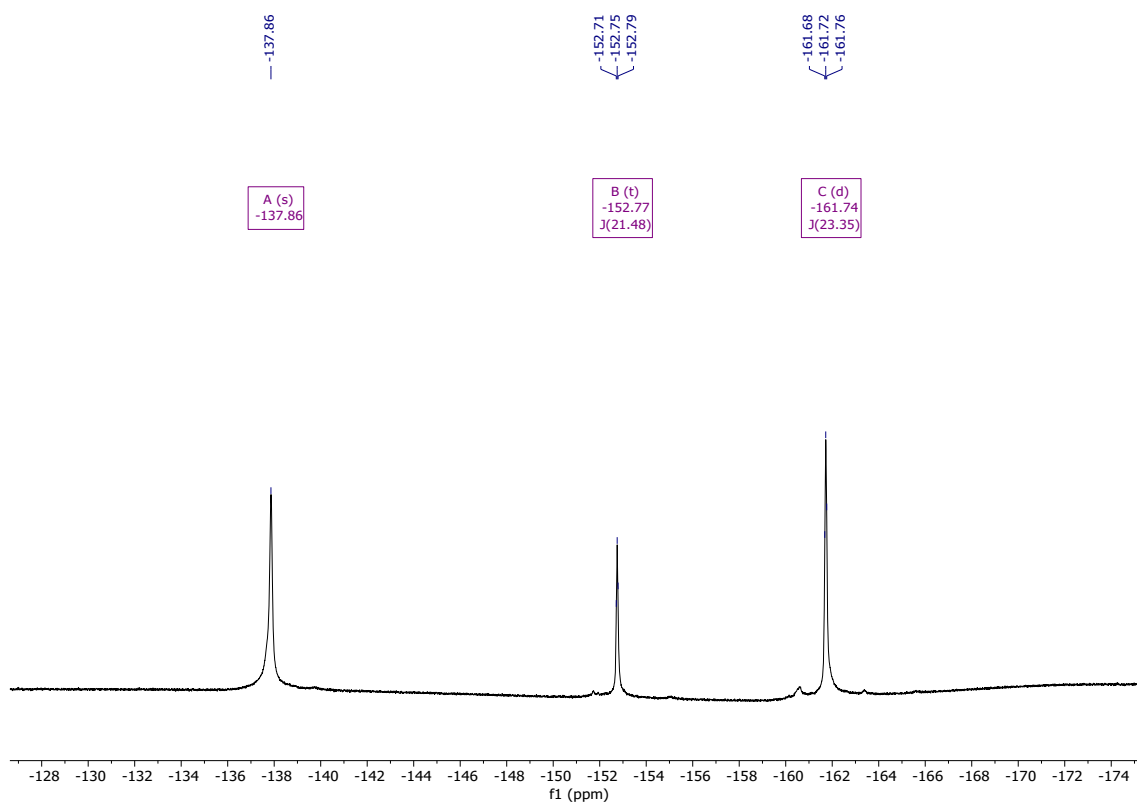

Figure S6.  $^{19}\text{F}$  NMR spectrum (565 MHz) of corrole  $\text{H}_3\text{LapCor}$  in  $\text{CDCl}_3$ .

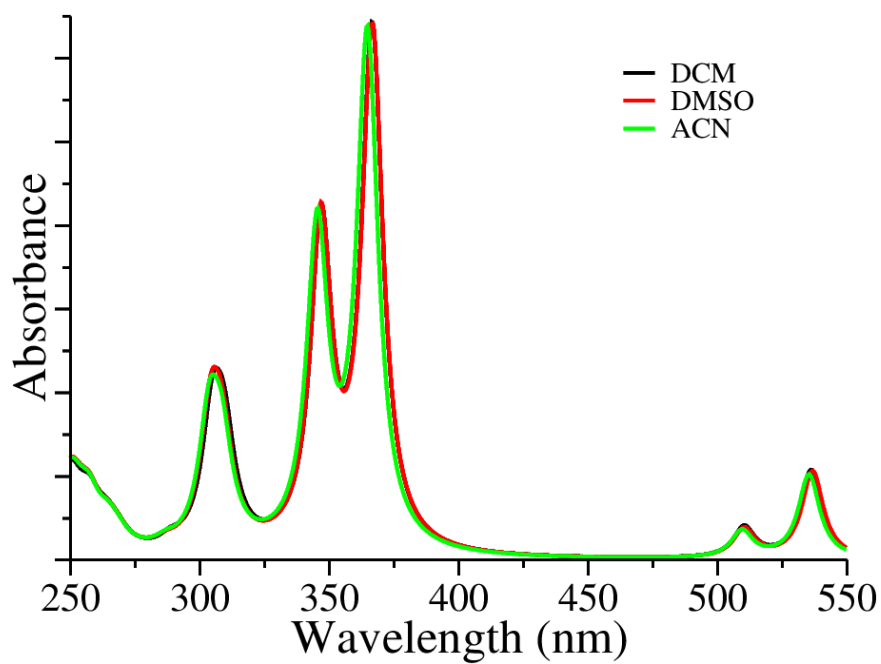

Figure S7. TD-DFT UV-Vis absorption spectra of corrole  $\text{H}_3\text{LapCor}$ .



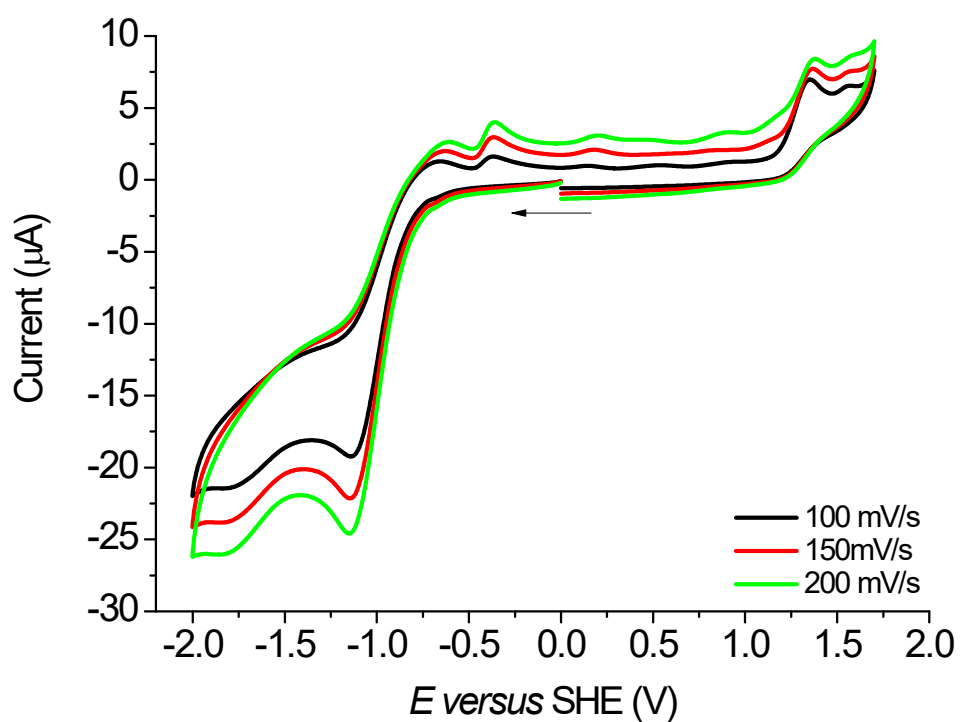

**Figure S8.** Cyclic voltametry of corrole **H<sub>3</sub>LapCor** in dry DCM solution.

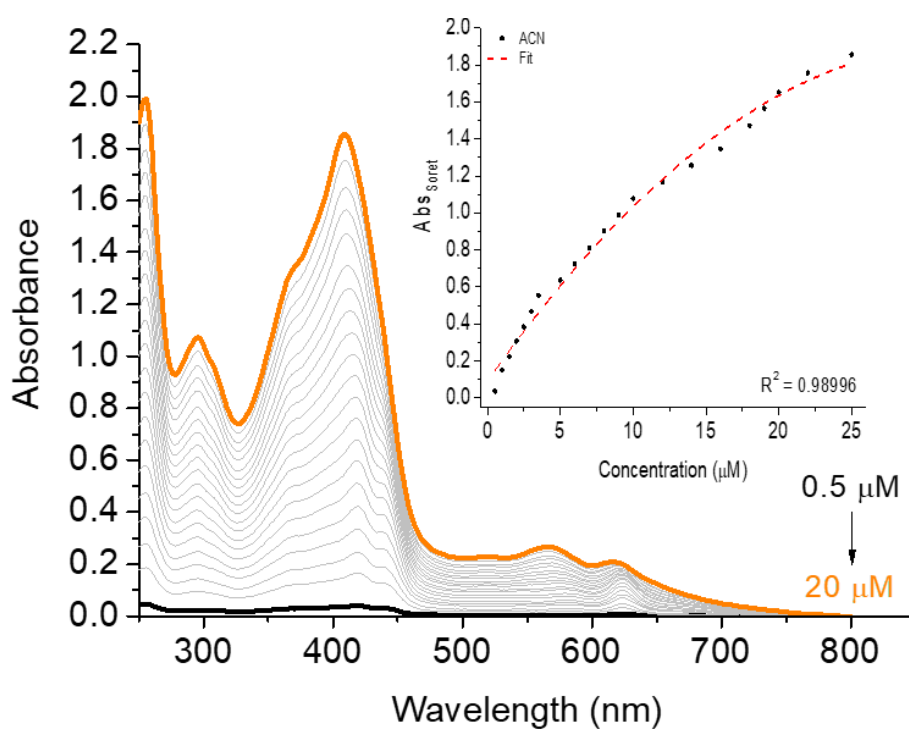

**Figure S9.** UV-Vis aggregation assays of corrole **H<sub>3</sub>LapCor** in ACN solution, in the concentration variation from 0.5 to 20  $\mu\text{M}$ . Inset:  $\text{Abs}_{\text{Soret}}$  versus concentration plot.

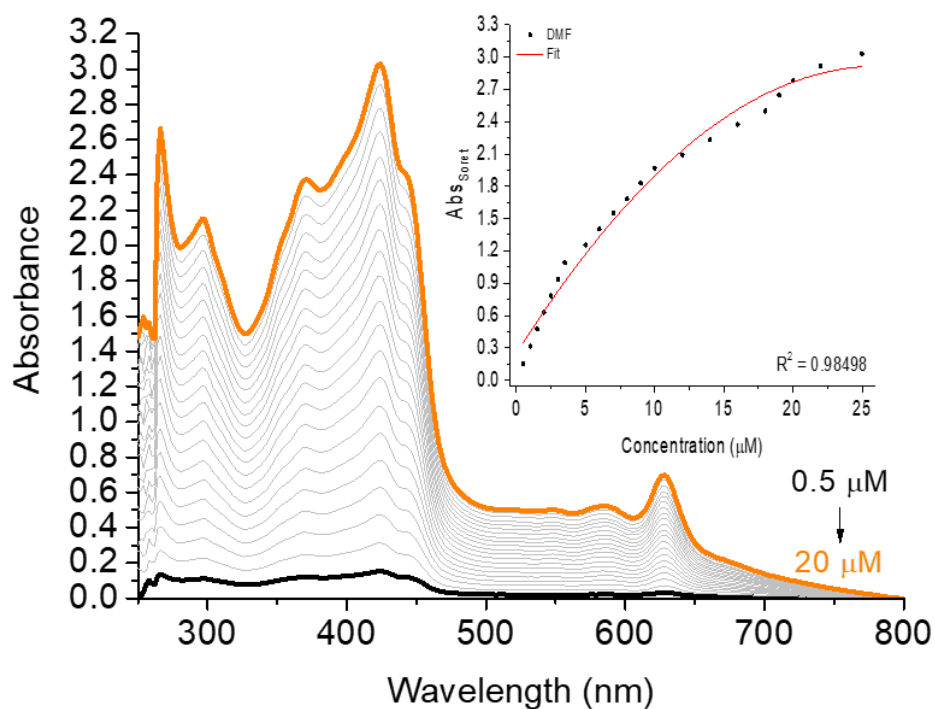

**Figure S10.** UV-Vis aggregation assays of corrole  $H_3LapCor$  in DMF solution, in the concentration variation from 0.5 to 20  $\mu M$ . Inset:  $Abs_{Soret}$  versus concentration plot.

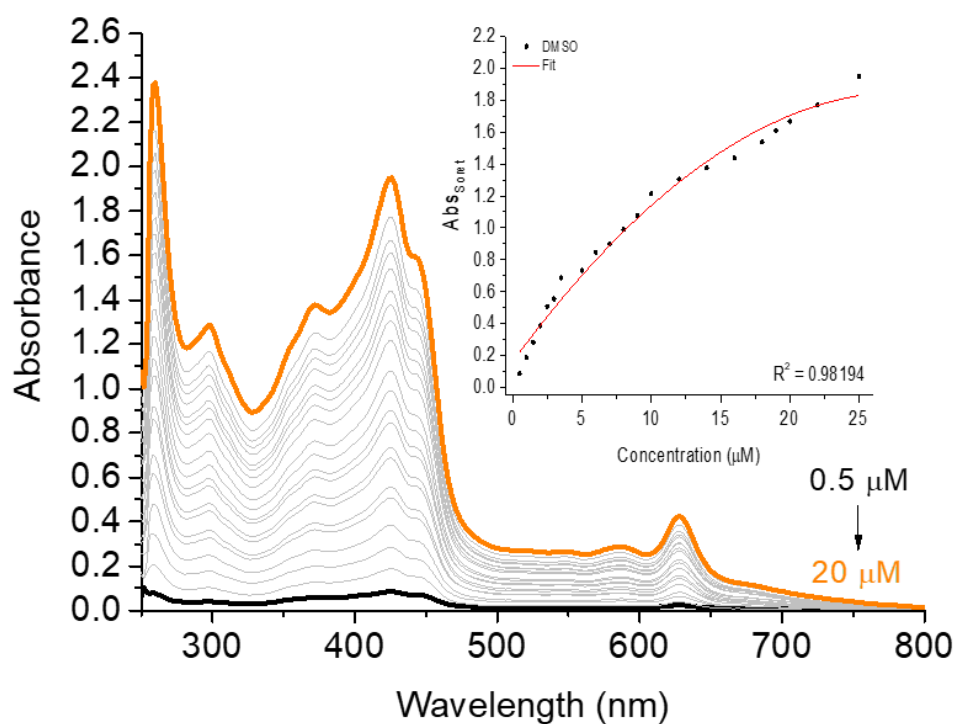

**Figure S11.** UV-Vis aggregation assays of corrole  $H_3LapCor$  in DMSO solution, in the concentration variation from 0.5 to 20  $\mu M$ . Inset:  $Abs_{Soret}$  versus concentration plot.

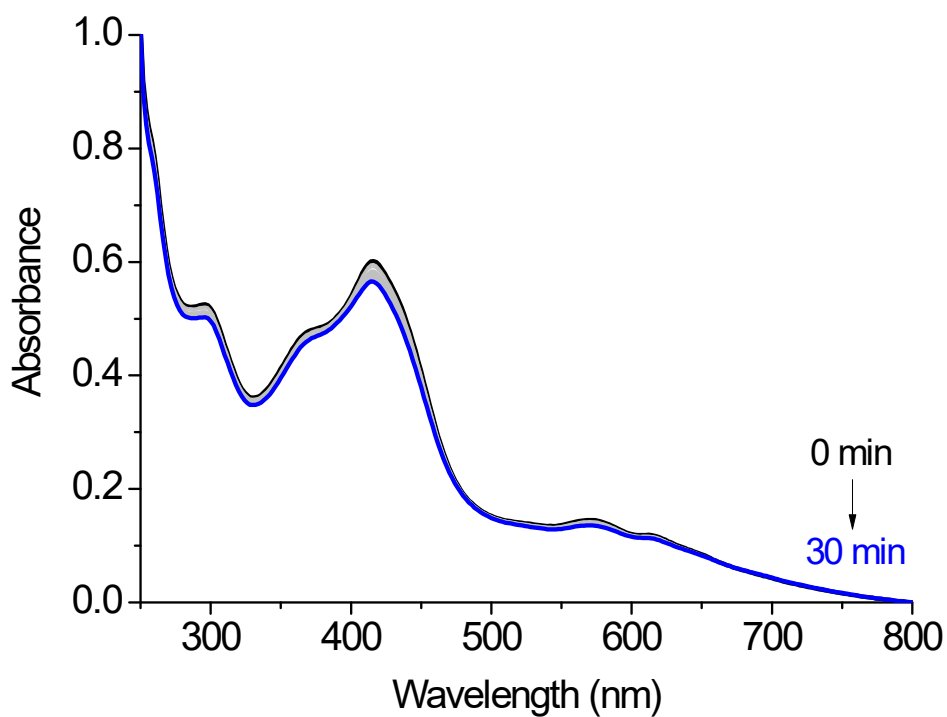

**Figure S12.** Photostability assays by UV-Vis analysis of corrole **H<sub>3</sub>LapCor** in DMSO(5%)/Tris-HCl pH 7.4 buffer mixture solution, in white-light irradiation conditions, at period of 30 min.

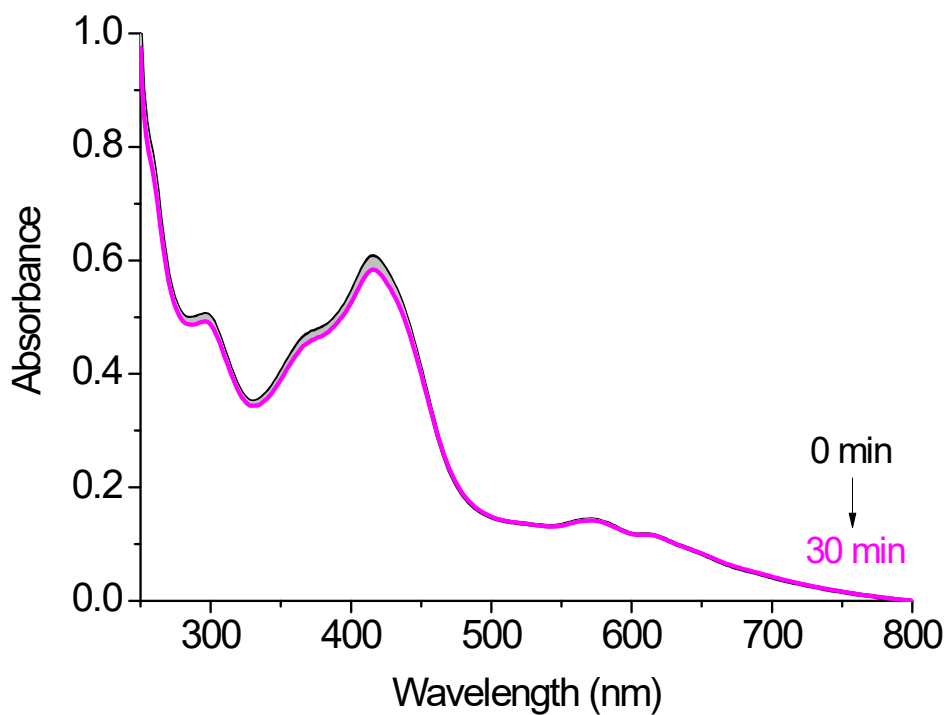

**Figure S13.** Photostability assays by UV-Vis analysis of corrole **H<sub>3</sub>LapCor** in DMSO(5%)/Tris-HCl pH 7.4 buffer mixture solution, in red-light irradiation conditions, at period of 30 min.

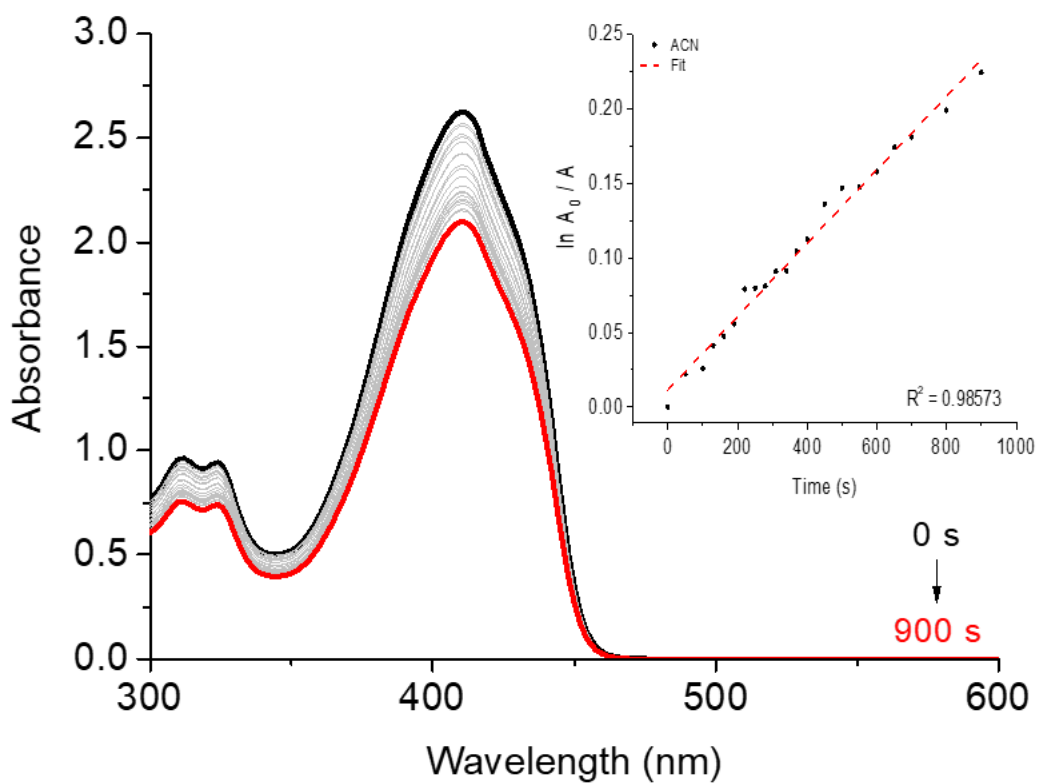

**Figure S14.** DPBF photo-oxidation experiment in ACN solution by irradiation with red-light LED source (660 nm; irradiance of  $100 \text{ mW cm}^{-2}$  and a total light dosage of  $90 \text{ J cm}^{-2}$ ) in the presence of corrole  $\text{H}_3\text{LapCor}$ . The inset shows the first order kinetic profile.

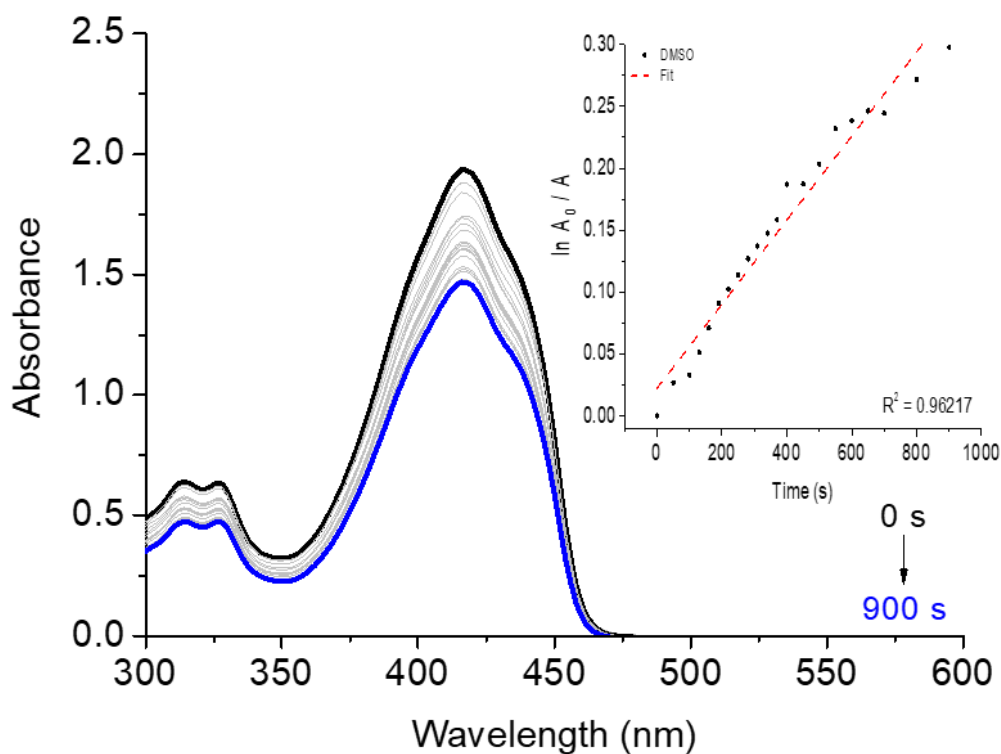

**Figure S15.** DPBF photo-oxidation experiment in DMSO solution by irradiation with red-light LED source (660 nm; irradiance of  $100 \text{ mW cm}^{-2}$  and a total light dosage of  $90 \text{ J cm}^{-2}$ ) in the presence of corrole  $\text{H}_3\text{LapCor}$ . The inset shows the first order kinetic profile.

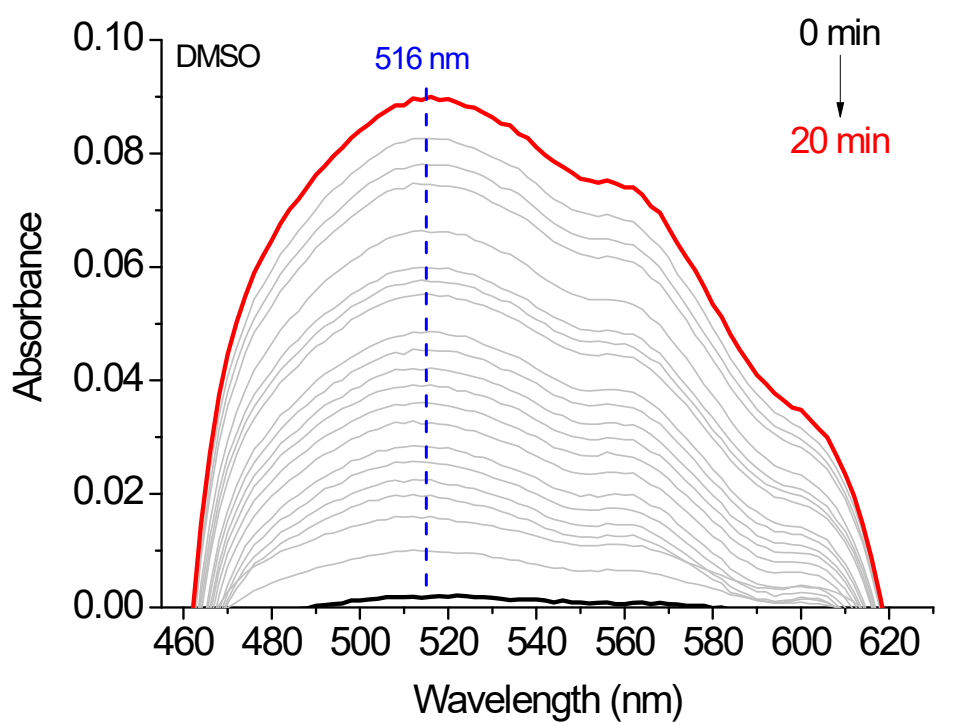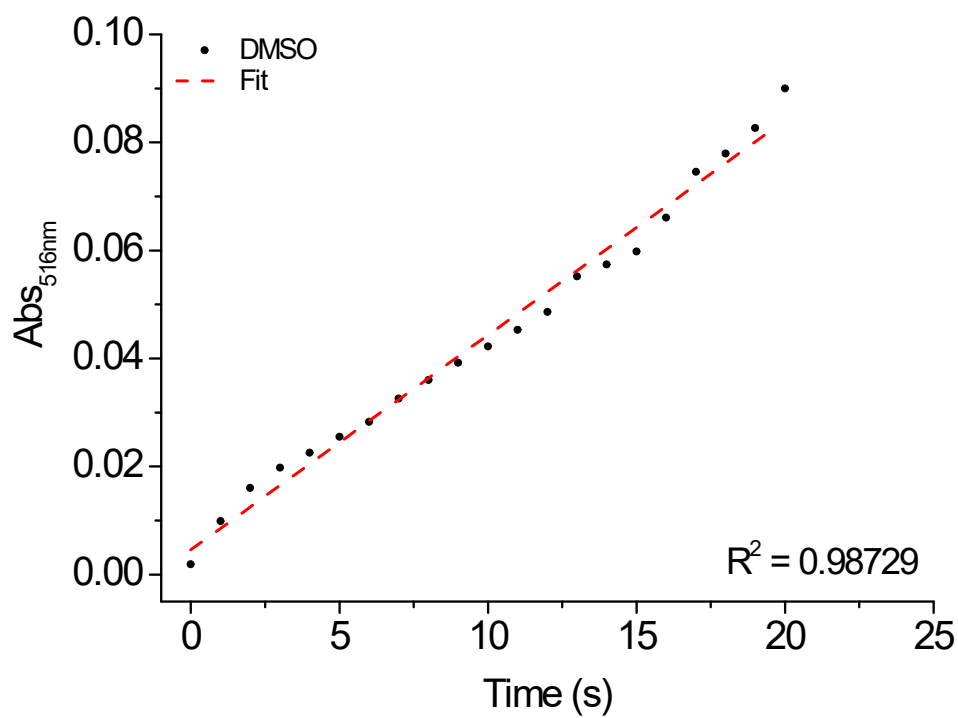

**Figure S16.** NBT reduction experiment in DMSO solution by irradiation with white-light LED source in the presence of corrole **H<sub>3</sub>LapCor**.

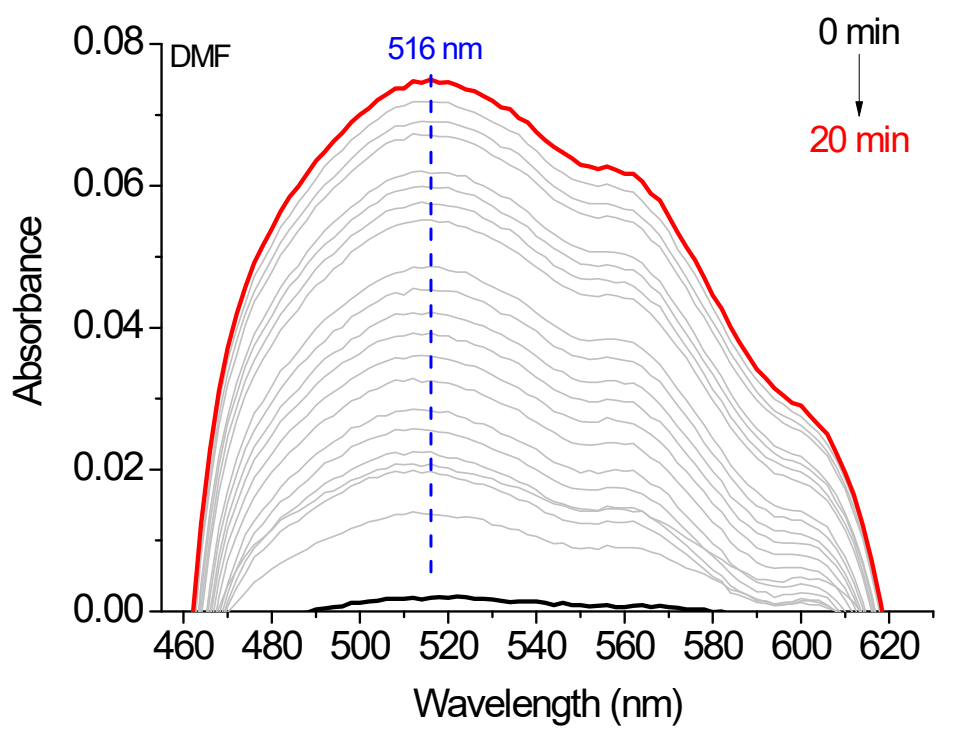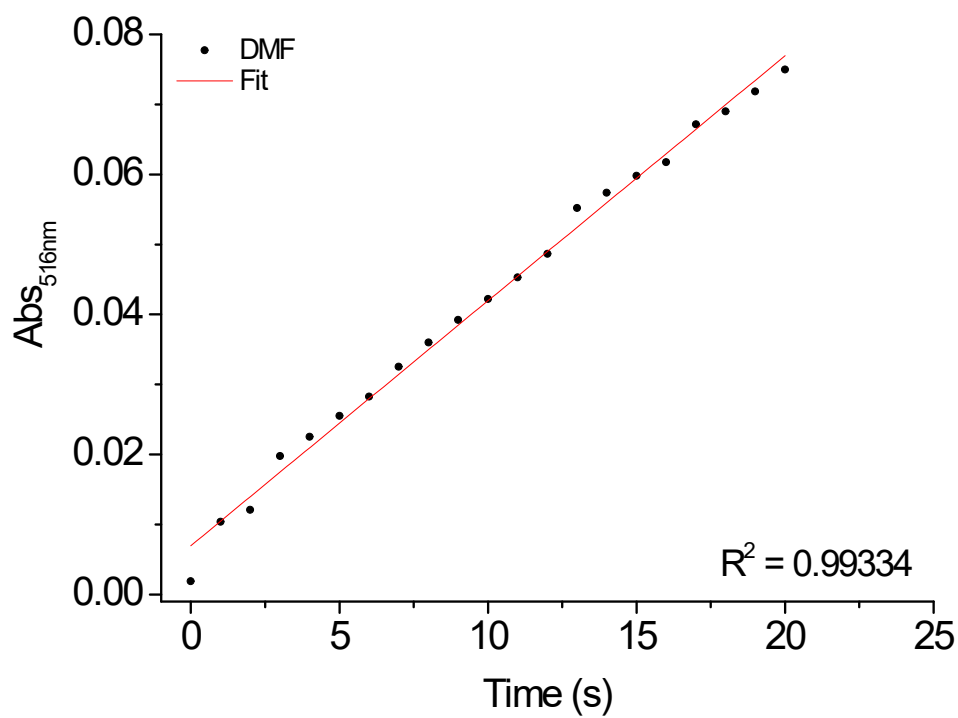

**Figure S17.** NBT reduction experiment in DMF solution by irradiation with white-light LED source in the presence of corrole **H<sub>3</sub>LapCor**.

**Table S1.** Vertical transitions, Energy, oscillator strength (f), and Dipole Moment for the corrole-lapachone in three different solvent environments.

| Environment | Transition            | Energy eV(nm)   | f      | Dipole Moment |
|-------------|-----------------------|-----------------|--------|---------------|
| DCM         | $S_0 \rightarrow S_1$ | 2.3124 (536.17) | 0.3321 | 7.1398        |
|             | $S_0 \rightarrow S_2$ | 2.4297 (510.29) | 0.1145 |               |
|             | $S_0 \rightarrow S_3$ | 3.3820 (366.60) | 1.9428 |               |
|             | $S_0 \rightarrow S_4$ | 3.5742 (346.89) | 1.2044 |               |
| DMSO        | $S_0 \rightarrow S_1$ | 2.3100 (536.74) | 0.3287 | 7.7482        |
|             | $S_0 \rightarrow S_2$ | 2.4294 (510.34) | 0.1085 |               |
|             | $S_0 \rightarrow S_3$ | 3.3812 (366.68) | 1.9382 |               |
|             | $S_0 \rightarrow S_4$ | 3.5751 (346.79) | 1.2154 |               |
| ACN         | $S_0 \rightarrow S_1$ | 2.3160 (535.35) | 0.3287 | 7.6981        |
|             | $S_0 \rightarrow S_2$ | 2.4335 (509.49) | 0.1085 |               |
|             | $S_0 \rightarrow S_3$ | 3.3994 (364.73) | 1.9382 |               |
|             | $S_0 \rightarrow S_4$ | 3.5897 (345.39) | 1.2154 |               |
